# Supplementary material for: An innovative “unlocked mechanism” by a double key avenue for one-pot detection of microRNA-21 and microRNA-141
Source: PubMed Central journal article supplement — Theranostics. 2019 Jan 1;9(1):279–89. doi: 10.7150/thno.28474 (PMC6332803; doi:10.7150/thno.28474), 2019-01-01
Supplement: thnov09p0279s1.pdf [file thnov09p0279s1.pdf]

**An innovative “unlocked mechanism” by a double key avenue  
for one-pot detection of microRNA-21 and microRNA-141**

Weipan Peng<sup>1#</sup>, Qian Zhao<sup>1#</sup>, Minghui Chen<sup>1</sup>, Jiafang Piao<sup>1</sup>, Weichen Gao<sup>1</sup>, Xiaoqun Gong<sup>1,2\*</sup>, Jin Chang<sup>1\*</sup>

<sup>1</sup> School of Life Sciences, Tianjin University and Tianjin Engineering Center of Micro-Nano Biomaterials and Detection-Treatment Technology (Tianjin), Tianjin 300072, China

<sup>2</sup> State Key Laboratory of Medicinal Chemical Biology, Nankai University, Tianjin 300072, China

#Authors who contributed equally to this work.

\*Corresponding authors: Xiaoqun Gong, gongxiaoqun@tju.edu.cn

Jin Chang, jinchang@tju.edu.cn

**Table S1.** Oligonucleotide sequences of miRNAs (miR-21, miR-141, miR-200b, Let-7d, negative control miRNA (NC), single mismatched miRNA (SM)) and the modified DNA probes (HD-21, HD-141, ssDNA-21, ssDNA-141, FAM-ssDNA, Cy5-ssDNA) for miRNA detection.

| Name      | Sequence (5'-3')                                           |
|-----------|------------------------------------------------------------|
| HD-21     | CCTCAACATCAGTCTGATAAGCTAGTTGAGGTTTTTTTTTTT-NH <sub>2</sub> |
| HD-141    | ATTGTGACAGACCATTCTACCACAATTTTTTTTTTTT-NH <sub>2</sub>      |
| ssDNA-21  | AAAACCTCAACC-NH <sub>2</sub>                               |
| ssDNA-141 | AAAAATTGTTTT-NH <sub>2</sub>                               |
| FAM-ssDNA | FAM-AAAACCTCAACC-NH <sub>2</sub>                           |
| Cy5-ssDNA | AAAACCTCAACC-Cy5                                           |
| miR-21    | UAGCUUAUCAGACUGAUGUUGA                                     |
| miR-141   | UAACACUGUCUGGUAAGAUGG                                      |
| NC        | UUGUACUACACAAAAGUACUG                                      |
| miR-200b  | UAUACUGCCUGGUAUGAUGA                                       |
| Let-7d    | AGAGGUAGUAGGUUGCAUAGUU                                     |
| SM        | UAGCUUAUCGGACUGAUGUUGA                                     |

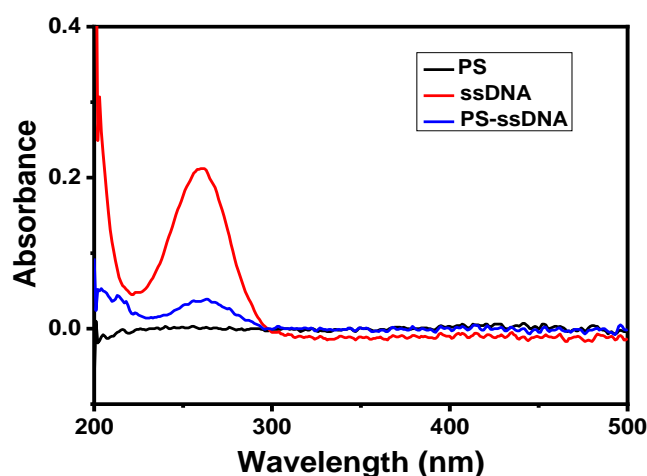

**Figure S1.** The UV-vis absorption spectra of PS (black line), ssDNA (red line) and the purified PS-ssDNA probes (blue line).

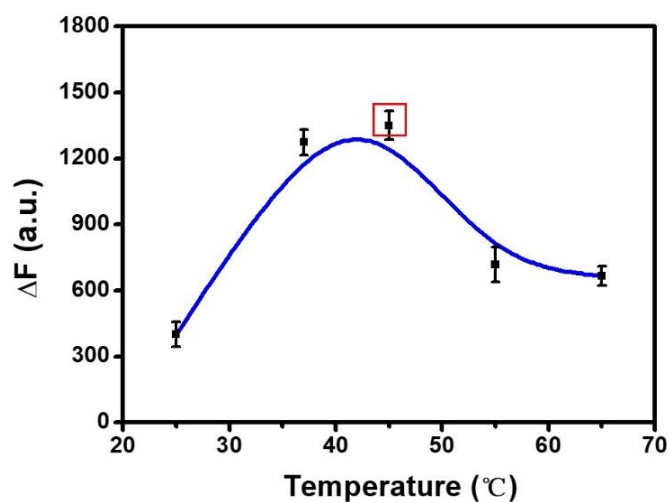

**Figure S2.** Optimization test of the reaction temperature for the double key unlocking detection assay.

**Table S2.** The hairpin DNA probes of HD-21(a) and HD-21(b)

| Name      | Sequence (5'-3')                                           |
|-----------|------------------------------------------------------------|
| HD-21 (a) | CCTCAACATCAGTCTGATAAGCTAGTTGAGGTTTTTTTTTTT-NH <sub>2</sub> |
| HD-21 (b) | ATTGTGACAGACCATTCTACCACAATTTTTTTTTTTT-NH <sub>2</sub>      |

  

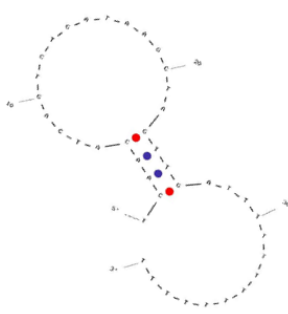

HD-21(a)



HD-21(b)

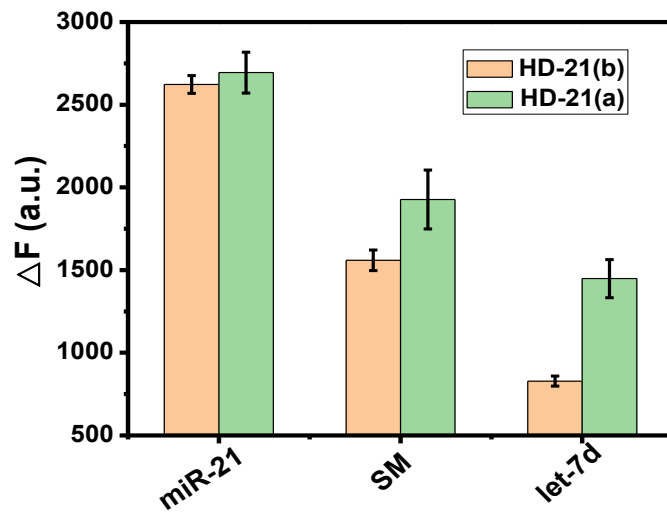

**Figure S3.** The specificity test of different hairpin DNA probes for miR-21 detection.

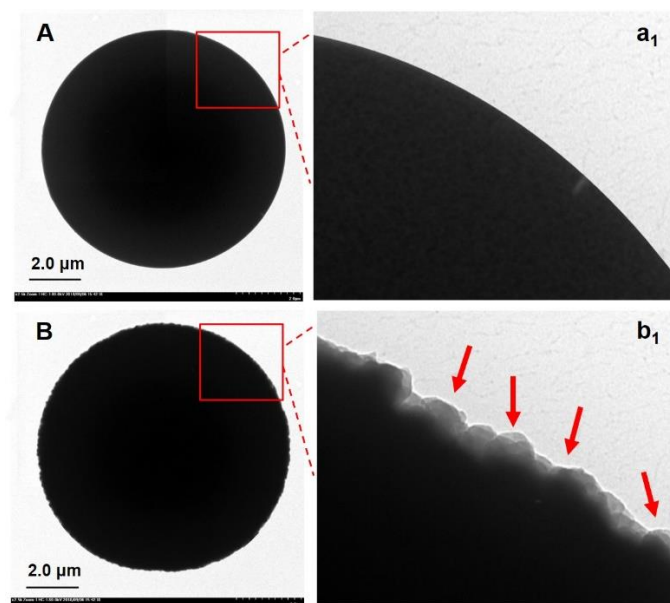

**Figure S4.** TEM images of PS microparticles before modification (**A**, **a<sub>1</sub>**) and PS-ssDNA-FS conjugates after modification (**B**, **b<sub>1</sub>**). In comparison with PS microparticles of smooth surface, we observe rough surface of PS-ssDNA-FS conjugates after reactions. The small beads (indicated by red arrows) on the surface of PS microparticles (10  $\mu\text{m}$ ) are FS particles (50 nm).

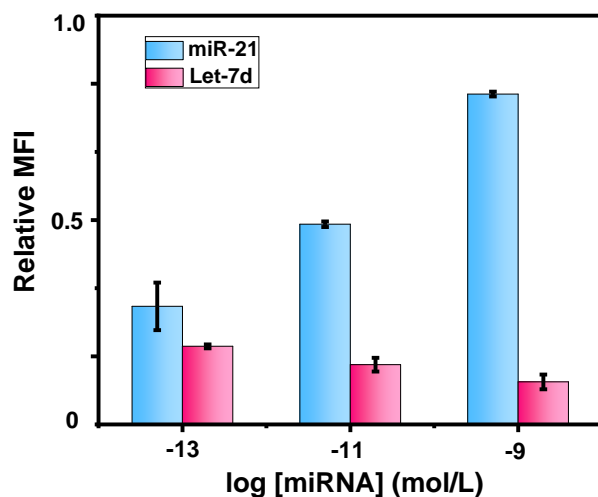

**Figure S5. Feasibility study of our assay.** Different concentrations of miR-21 and Let-7d were used for the flow cytometry assay. With the increase of miRNA content, the fluorescence intensity detected for miR-21 was gradually increased, but the fluorescence intensity for Let-7d remained basically unchanged.

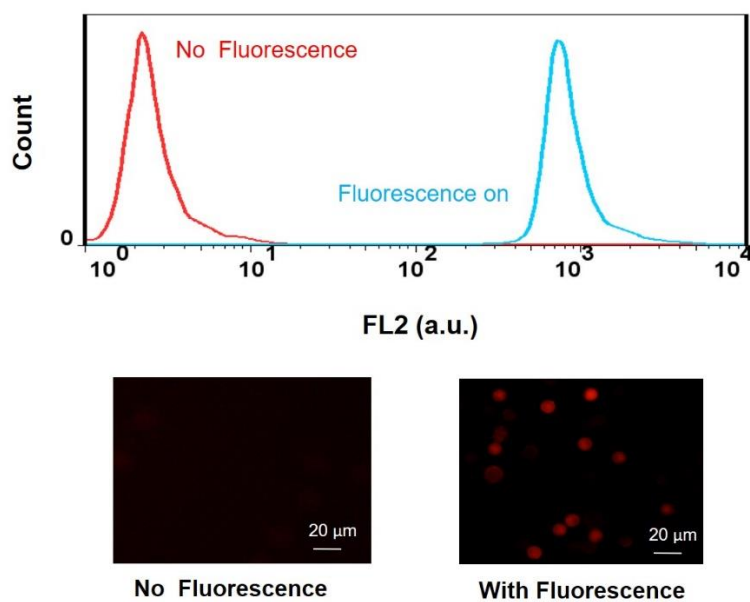

**Figure S6. Detections for miR-141.** Flow cytometry detections and fluorescent images of probe 2 for miR-141 detection before (no fluorescence) and after (with fluorescence) reactions.

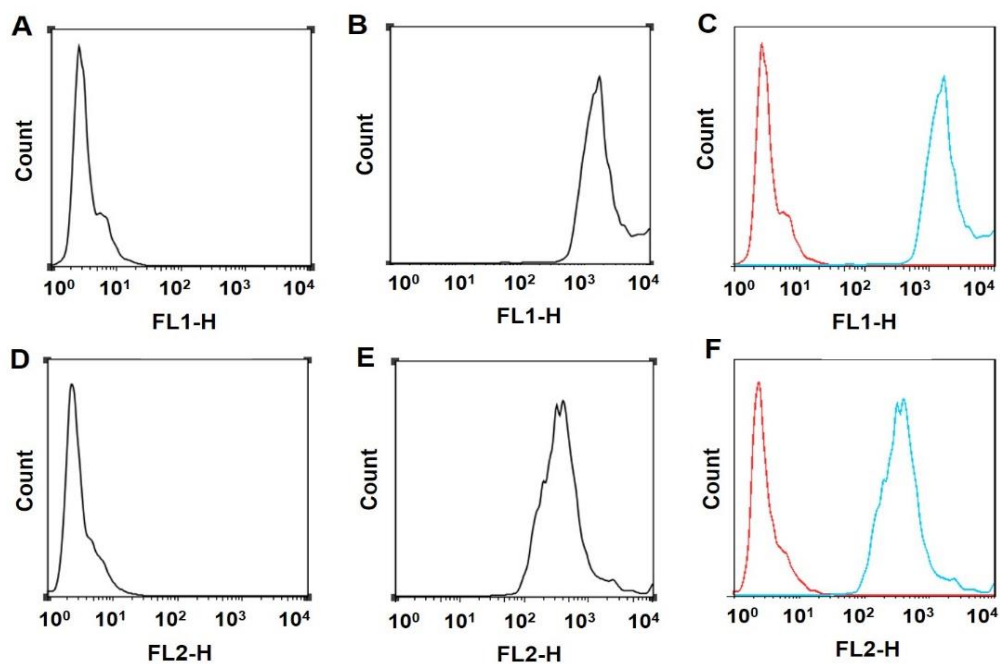

**Figure S7. Histograms of fluorescence response of the multiplexed analysis of miR-21(FL1-H) and miR-141 (FL2-H) assay. Figure S7C and S7F were respectively merged by the results of A/B and D/E.**

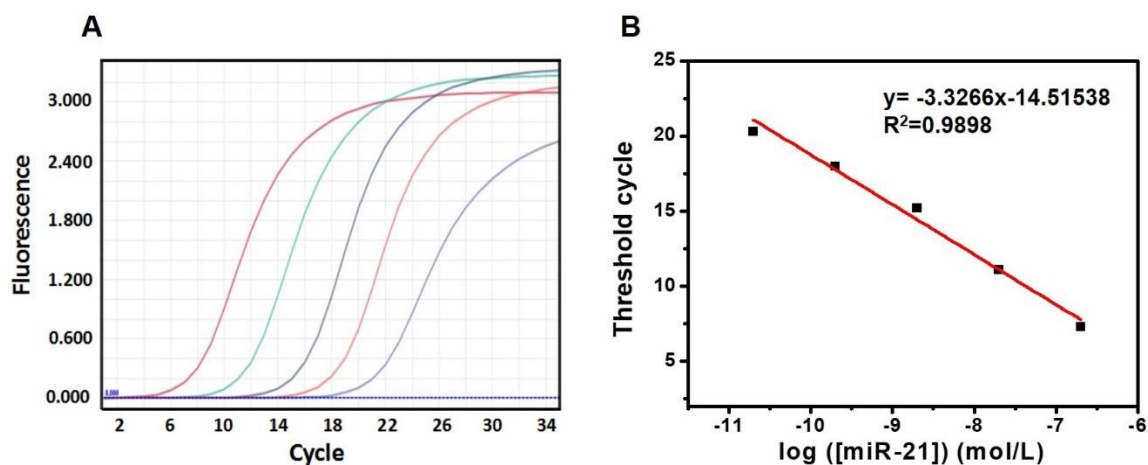

**Figure S8. Real simple detection by qRT-PCR. (A) The real-time qRT-PCR curves of different concentrations of target detection. (B) The linear relationship of the miRNA concentrations and the threshold cycle.**

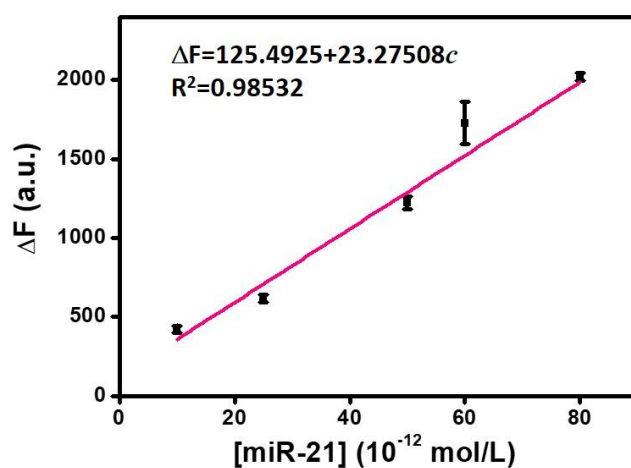

**Figure S9.** Calibration curve of  $\Delta F$  value vs. concentration of miRNA-21 using the proposed method serviced for the miRNA-21 detection in human serum samples. A linear relationship between  $\Delta F$  and different concentrations of miR-21 (10, 25, 50, 60, 80 pM) is observed, and the linear equation is  $\Delta F = 125.4925 + 23.27508c$  ( $R^2 = 0.98532$ ).

**Table S3.** Analytical recoveries of the proposed assay in detecting miR-21 spiked human serum samples.

| miRNA-21 |                                  |                 |            |
|----------|----------------------------------|-----------------|------------|
| Sample   | Founded<br>(10 <sup>-12</sup> M) | Recovery<br>(%) | RSD<br>(%) |
| 1        | 48.35667                         | 96.71           | 6.25%      |
| 2        | 44.64333                         | 89.29           | 10.67%     |
| 3        | 48.90                            | 97.8            | 7.68%      |
| 4        | 54.32667                         | 108.65          | 4.04%      |
| 5        | 47.52667                         | 95.05           | 11.75%     |

**Table S4.** The detection limit for miRNA of this proposed method and other detection strategies

| Method           | Materials                         | LOD     | Multiplex Detection | Reference |
|------------------|-----------------------------------|---------|---------------------|-----------|
| Fluorescence     | Microbeads and DSN                | 3.39 fM | Yes                 | Our work  |
| Fluorescence     | Molecular Beacons and DSN         | 0.4 pM  | No                  | [1]       |
| Colorimetry      | Cationic Polythiophene Derivative | 10 nM   | No                  | [2]       |
| Chemiluminescent | Magnetic Beads and DSN            | 10 fM   | No                  | [3]       |
| MRS              | magnetic Beads and DSN            | 5 fM    | No                  | [4]       |
| Electrochemistry | Graphene                          | 60 fM   | No                  | [5]       |
| Electrochemistry | DNA CPs and DSN                   | 1 fM    | No                  | [6]       |

### References

1. Lin X, Zhang C, Huang Y, Zhu Z, Chen X, Yang CJ. Backbone-modified molecular beacons for highly sensitive and selective detection of microRNAs based on duplex specific nuclease signal amplification. *Chem Commun (Camb)*. 2013; 49: 7243-7245.
2. Zhang Y, Li Z, Cheng Y, Lv X. Colorimetric detection of microRNA and RNase H activity in homogeneous solution with cationic polythiophene derivative. *Chem Commun (Camb)*. 2009: 3172-3174.
3. Deng H, Ren Y, Shen W, Gao Z. An ultrasensitive homogeneous chemiluminescent assay for microRNAs. *Chem Commun (Camb)*. 2013; 49: 9401-9403.
4. Lu W, Chen Y, Liu Z, Tang W, Feng Q, Sun J, et al. Quantitative detection of microRNA in one step via next generation magnetic relaxation switch sensing. *ACS Nano*. 2016; 10: 6685-6692.
5. Yin H, Zhou Y, Zhang H, Meng X, Ai S. Electrochemical determination of microRNA-21 based on graphene, LNA integrated molecular beacon, AuNPs and biotin multifunctional bio bar codes and enzymatic assay system. *Biosens Bioelectron*. 2012; 33: 247-253.
6. Ren Y, Deng H, Shen W, Gao Z. A highly sensitive and selective electrochemical biosensor for direct detection of microRNAs in serum. *Anal Chem*. 2013; 85: 4784-4789.
